# Supplementary material for: Effects of rpl1001 Gene Deletion on Cell Division of Fission Yeast and Its Molecular Mechanism
Source: MDPI journal article supplement (doi:10.3390/cimb46030164), 2024-03-18
Supplement: s1 [file s1]

**Table S1.** Statistics of transcriptome sequencing quality analysis of the wt and *rpl1001Δ* strains

| Sample            | Raw reads | Clean reads | Clean bases (G) | Error rate | Q20% | Q30% | GC pct |
|-------------------|-----------|-------------|-----------------|------------|------|------|--------|
| wt-1              | 47703748  | 46447832    | 7.0             | 0.0        | 98.3 | 94.6 | 41.4   |
| wt-2              | 46164428  | 45173776    | 6.8             | 0.0        | 98.5 | 95.1 | 41.4   |
| wt-3              | 45435808  | 44388600    | 6.7             | 0.0        | 98.1 | 94.1 | 41.2   |
| <i>rpl1001</i> -1 | 46569660  | 45398452    | 6.8             | 0.0        | 98.6 | 95.5 | 41.7   |
| <i>rpl1001</i> -2 | 45874544  | 44824696    | 6.7             | 0.0        | 98.4 | 94.9 | 41.5   |
| <i>rpl1001</i> -3 | 47331844  | 46056410    | 6.9             | 0.0        | 98.3 | 94.8 | 41.5   |
